# Supplementary material for: Anticorrosion Properties of a Novel Hybrid Sol–Gel Coating on Aluminum 3003 Alloy
Source: MDPI journal article supplement (doi:10.3390/polym14091798), 2022-04-28
Supplement: s1 [file s1]

Supplementary

# Anticorrosion Properties of a Novel Hybrid Sol-Gel Coating on Aluminum 3003 Alloy

Rami K. Suleiman <sup>1,\*</sup>, Akeem Y. Adesina <sup>1</sup>, Arumugam Madhan Kumar <sup>1</sup>, Mohammad Mizanur Rahman <sup>1</sup>, Fadi A. Al-Badour <sup>1,2</sup> and Bassam El Ali <sup>3</sup>

<sup>1</sup> Interdisciplinary Research Center for Advanced Materials, King Fahd University of Petroleum & Minerals (KFUPM), Dhahran 31261, Saudi Arabia; adesina@kfupm.edu.sa (A.Y.A.); madhankumar@kfupm.edu.sa (A.M.K.); mrahman@kfupm.edu.sa (M.M.R.); fbador@kfupm.edu.sa (F.A.A.-B.)

<sup>2</sup> Mechanical Engineering Department, King Fahd University of Petroleum and Minerals (KFUPM), Dhahran 31261, Saudi Arabia

<sup>3</sup> Chemistry Department, King Fahd University of Petroleum and Minerals (KFUPM), Dhahran 31261, Saudi Arabia; belali@kfupm.edu.sa

\* Correspondence: ramismob@kfupm.edu.sa; Tel.: +966-13-860-7580; Fax: +966-13-860-8317

## Figures

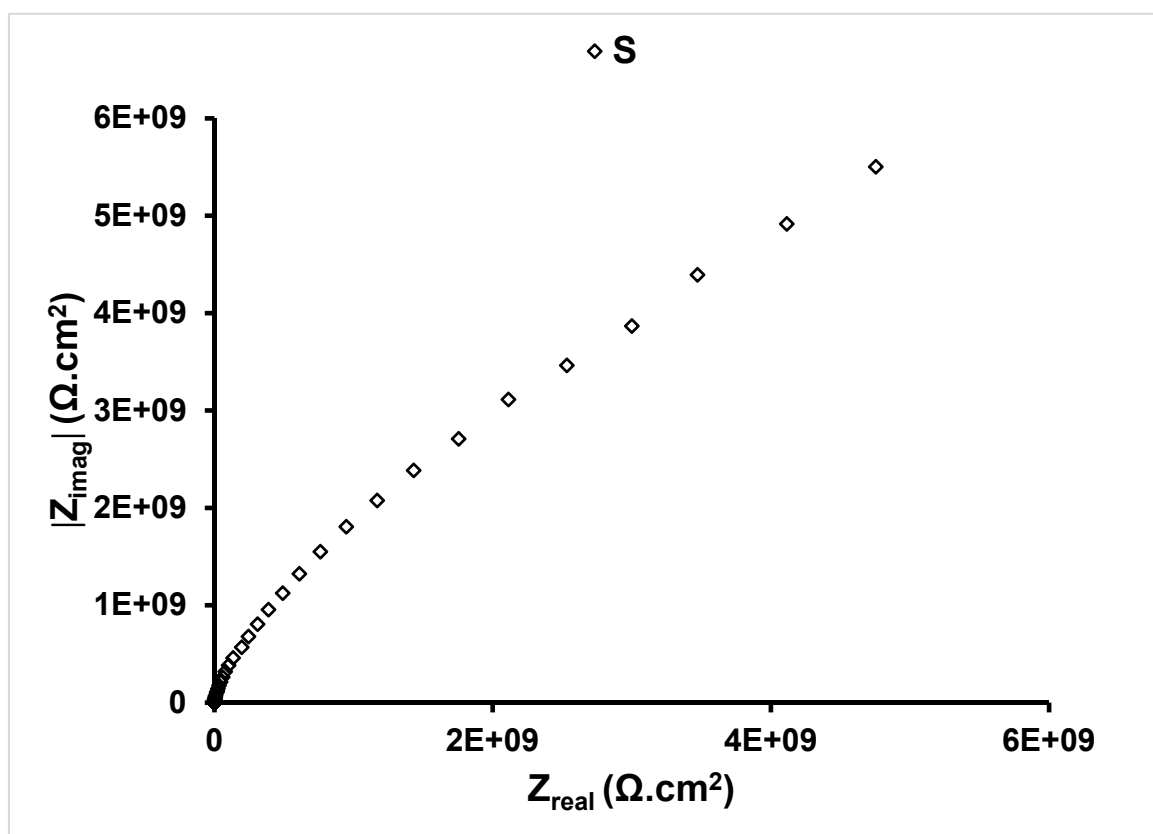

**Figure S1.** EIS Nyquist spectrum of S-coated samples on AA3003 substrate after 30 days of exposure to the 3.5 wt.% NaCl solution.

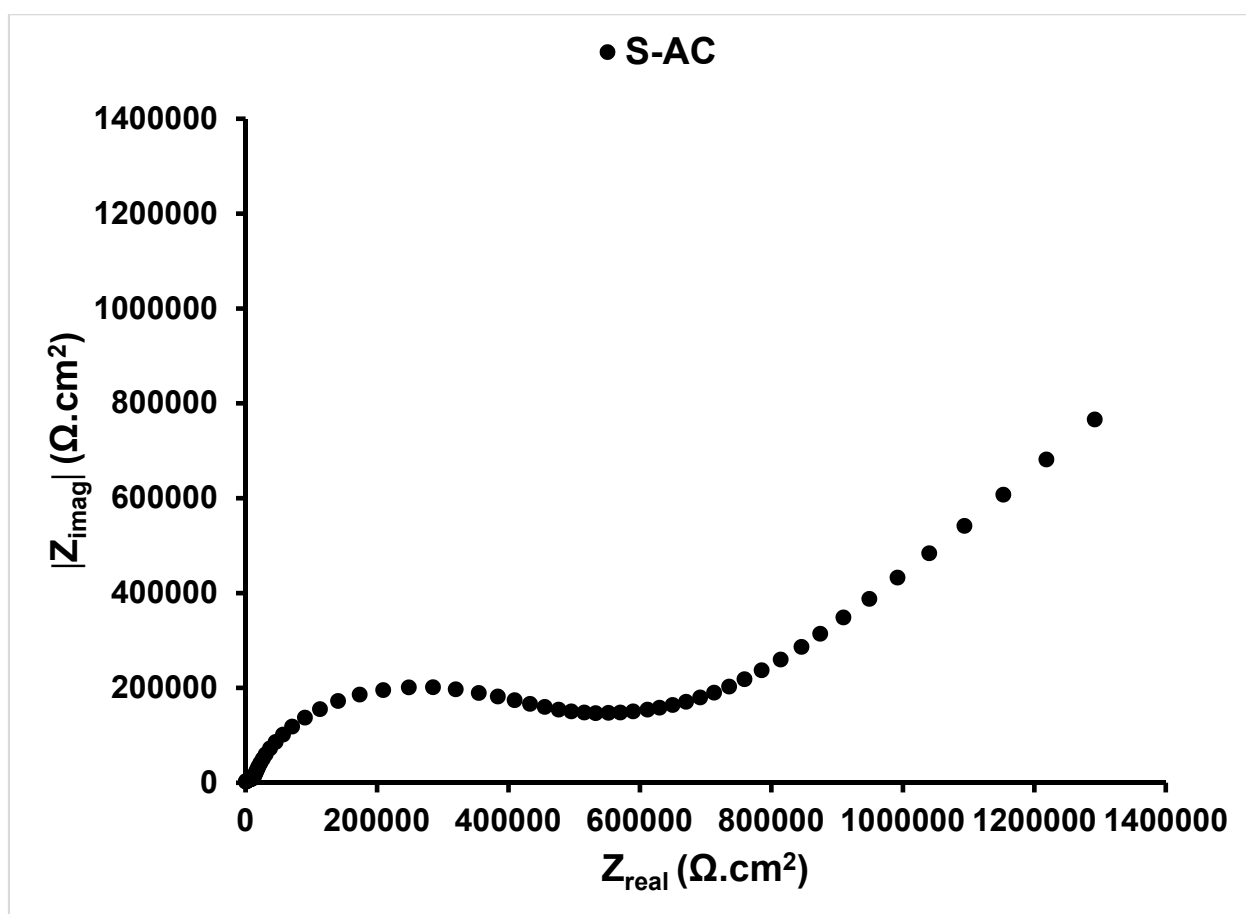

**Figure S2.** EIS Nyquist spectrum of S-AC-coated samples on AA3003 substrate after 30 days of exposure to the 3.5 wt.% NaCl solution.

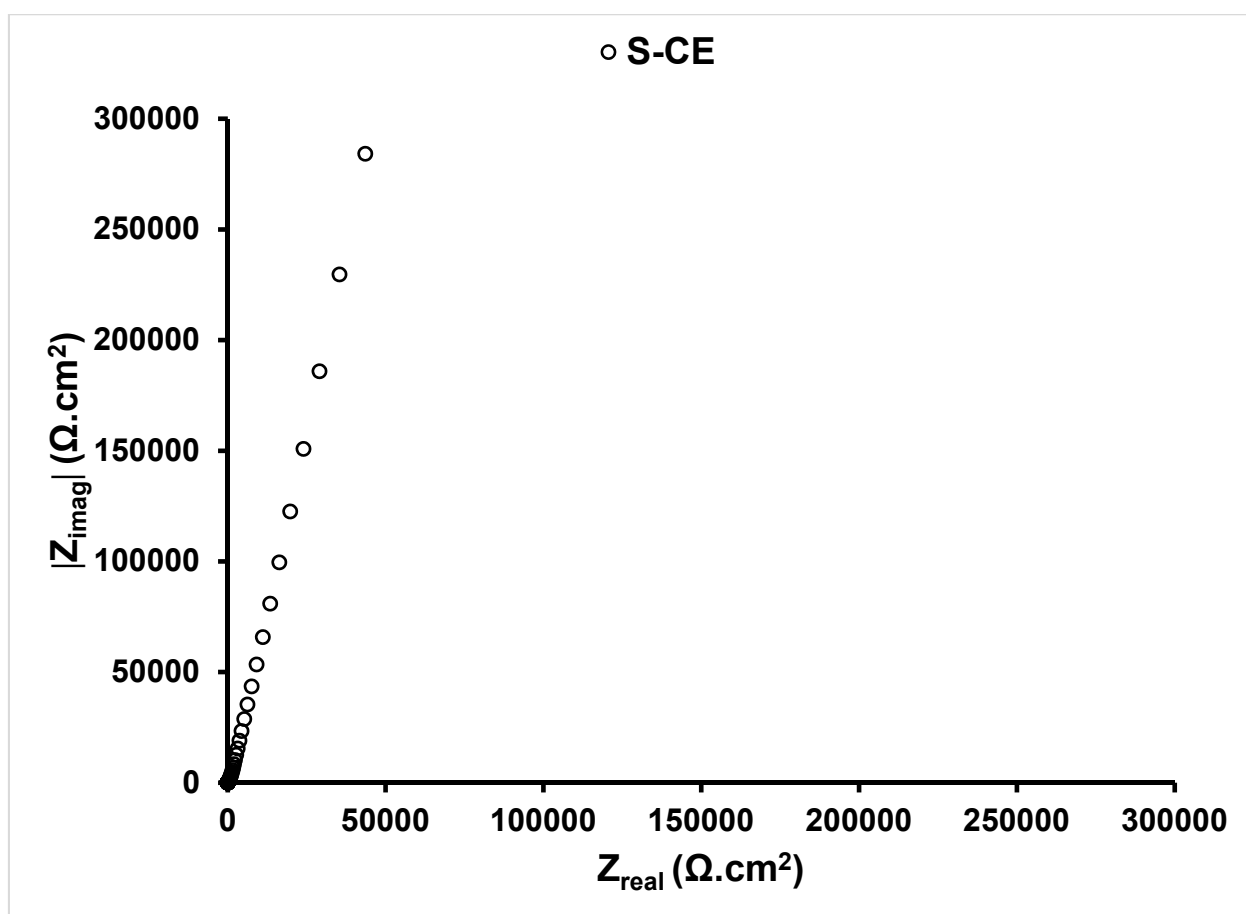

**Figure S3.** EIS Nyquist spectrum of S-CE-coated samples on AA3003 substrate after 30 days of exposure to the 3.5 wt.% NaCl solution.

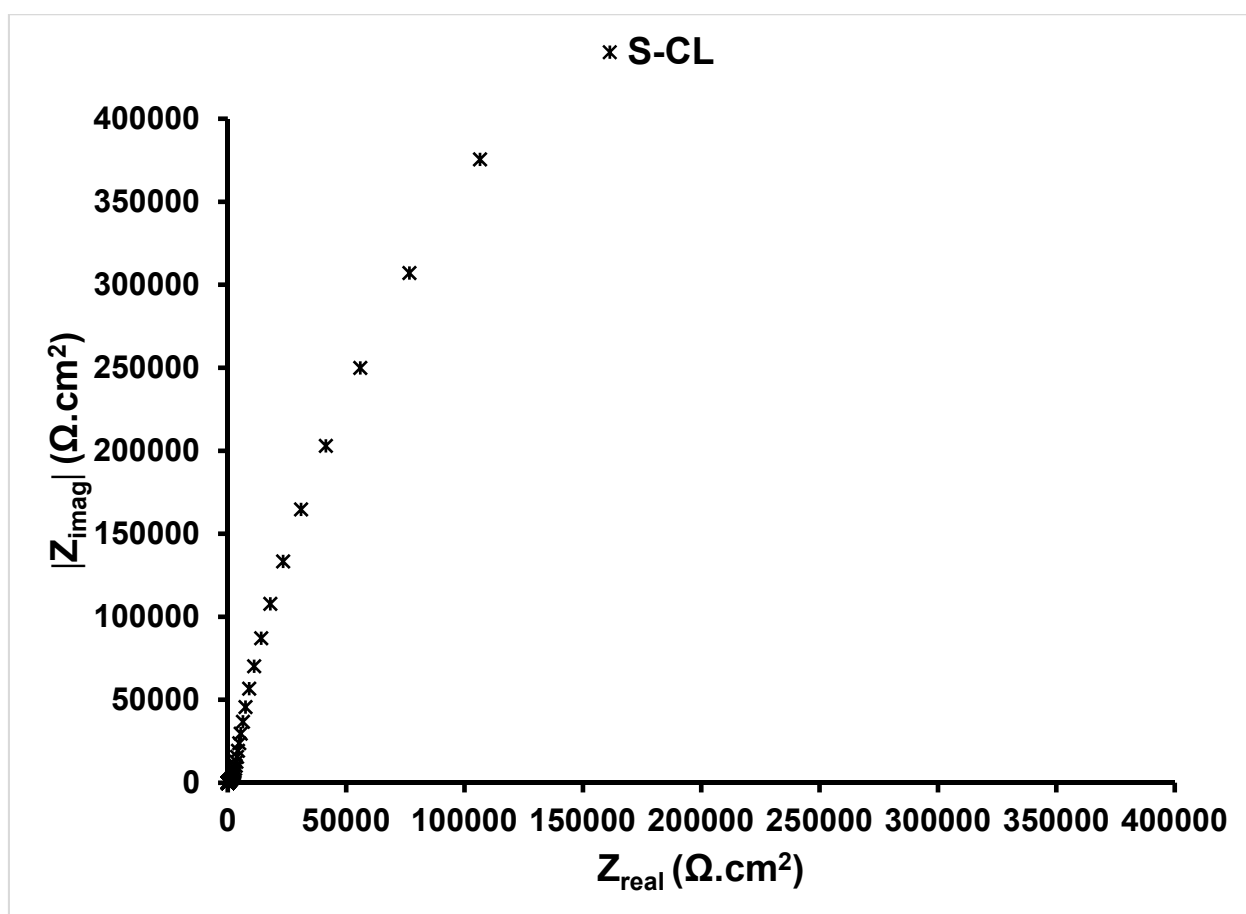

**Figure S4.** EIS Nyquist spectrum of S-CL-coated samples on AA3003 substrate after 30 days of exposure to the 3.5 wt.% NaCl solution.

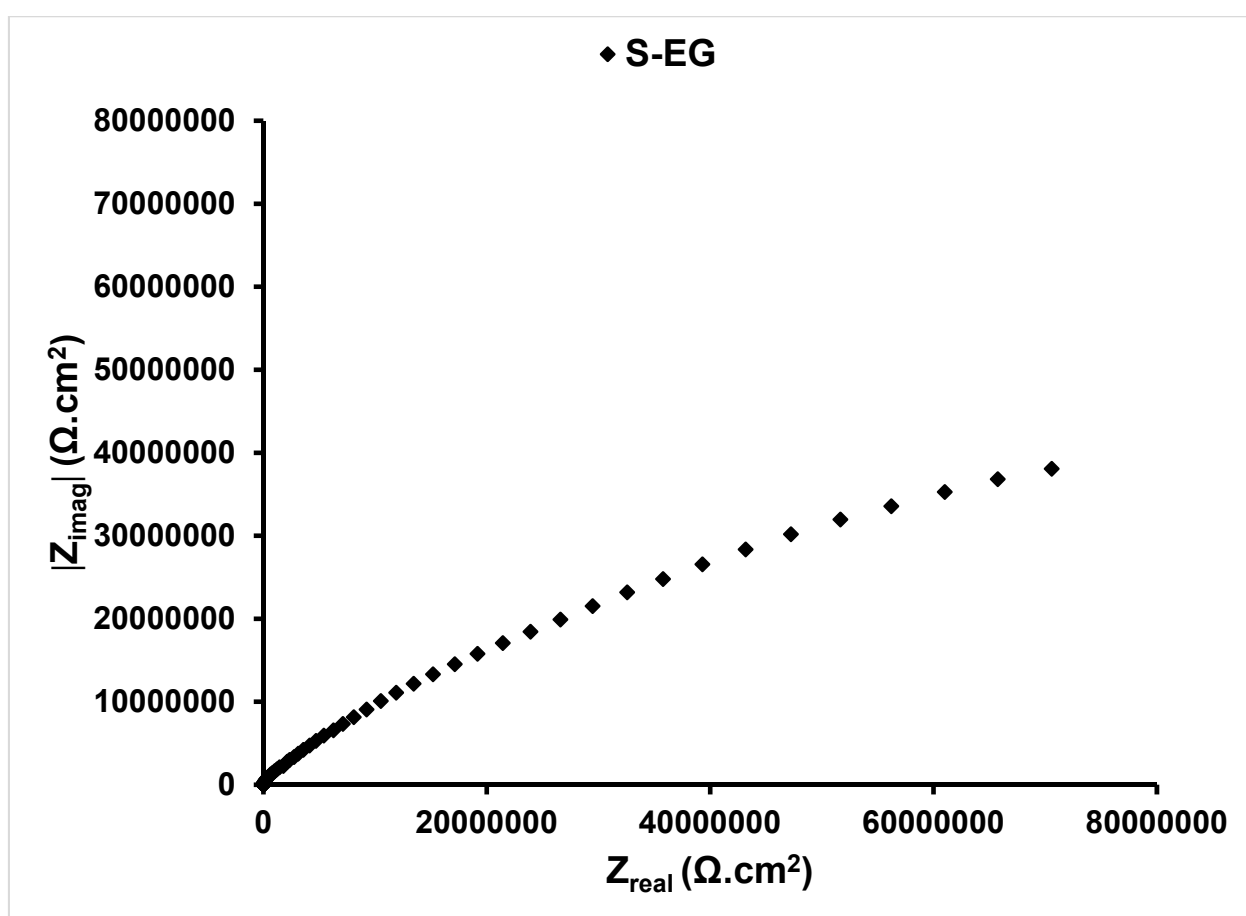

**Figure S5.** EIS Nyquist spectrum of S-EG-coated samples on AA3003 substrate after 30 days of exposure to the 3.5 wt.% NaCl solution.

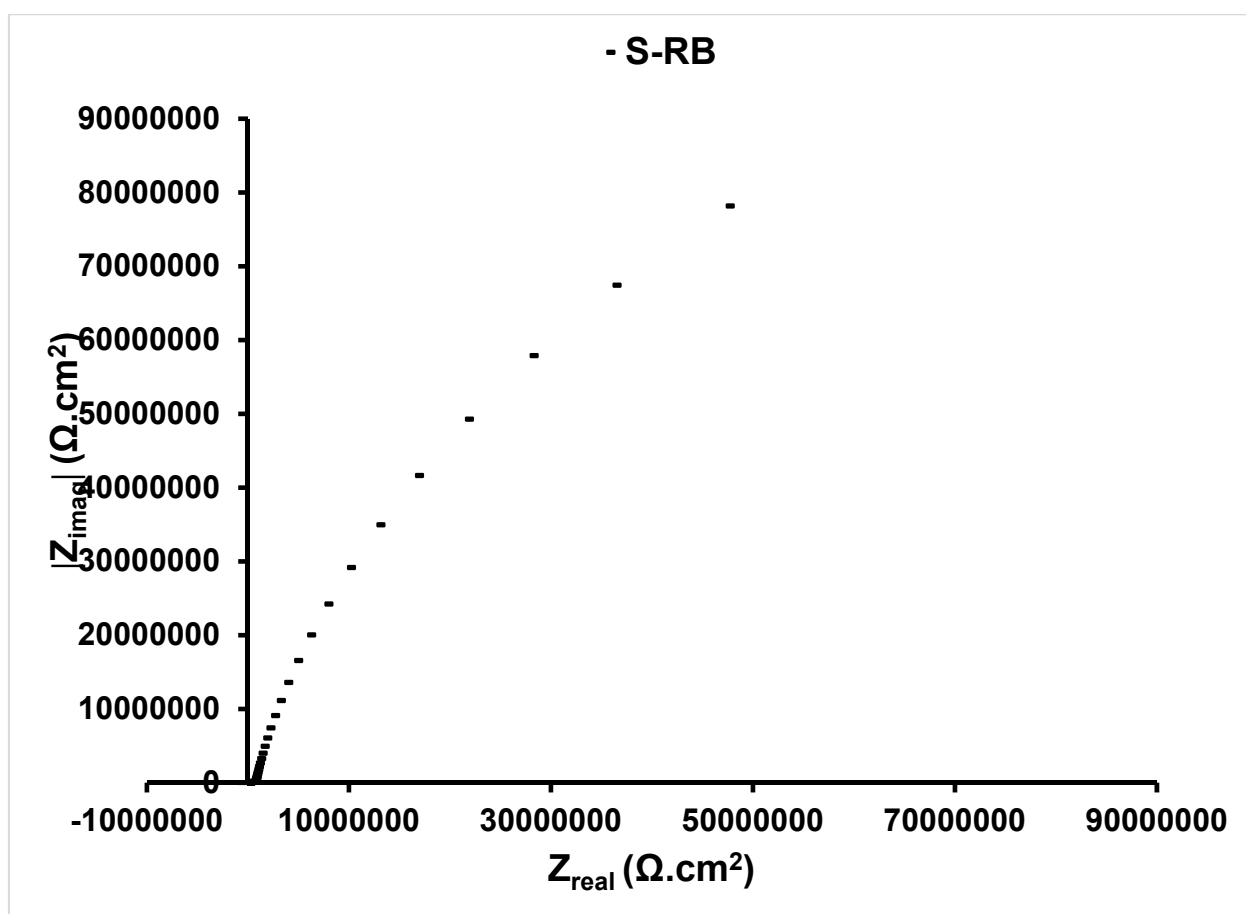

**Figure S6.** EIS Nyquist spectrum of **S-RB**-coated samples on AA3003 substrate after 30 days of exposure to the 3.5 wt.% NaCl solution.

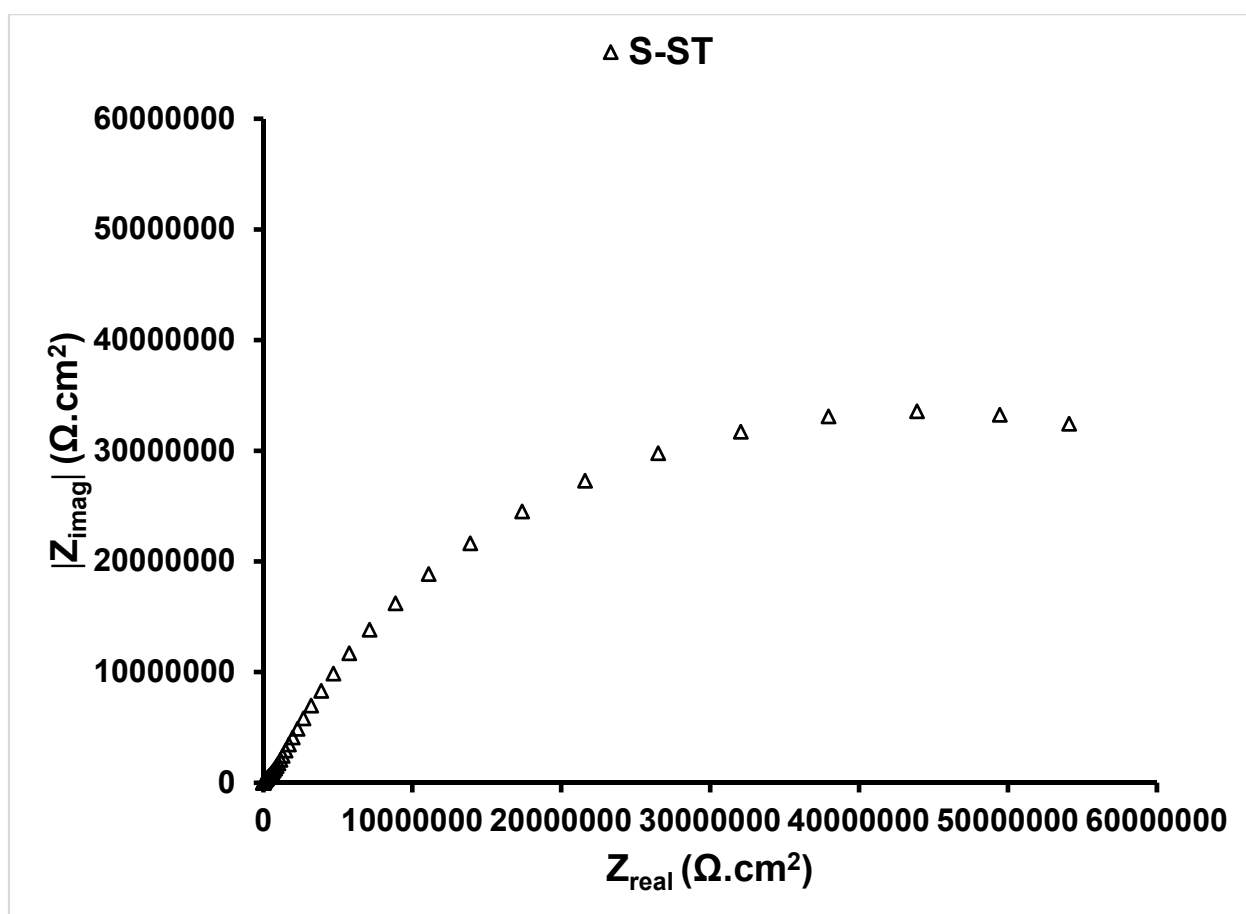

**Figure S7.** EIS Nyquist spectrum of S-ST-coated samples on AA3003 substrate after 30 days of exposure to the 3.5 wt.% NaCl solution.
